# Supplementary material for: Carotane sesquiterpenes from Ferula vesceritensis: in silico analysis as SARS-CoV-2 binding inhibitors
Source: Royal Society of Chemistry journal article supplement (doi:10.1039/d0ra06901a), 2020-01-01
Supplement: d0ra06901a1.pdf [file d0ra06901a1.pdf]

## Carotane Sesquiterpenes from *Ferula vesceritensis*: *in silico* Analysis as SARS-CoV-2 Binding Inhibitors

Tarik A. Mohamed<sup>a</sup>, Abdelsamed I. Elshamy<sup>b</sup>, Mahmoud A. A. Ibrahim<sup>c</sup>, Ammar Zellagui<sup>d</sup>, Mahmoud F. Moustafa<sup>e,f</sup>, Alaa H. M. Abdelrahman<sup>c</sup>, Shinji Ohta<sup>g</sup>, Paul W. Pare<sup>h,\*</sup>, Mohamed-Elamir F. Hegazy<sup>a,\*</sup>

<sup>a</sup>Chemistry of Medicinal Plants Department, National Research Centre, 33 El-Bohouth St., Dokki, Giza, 12622, Egypt. e-mail: [me.fathy@nrc.sci.eg](mailto:me.fathy@nrc.sci.eg); Fax: +20-23337093.

<sup>b</sup>Chemistry of Natural Compounds Department, National Research Centre, 33 El-Bohouth St., Dokki, Giza, 12622, Egypt.

<sup>c</sup>Computational Chemistry Laboratory, Chemistry Department, Faculty of Science, Minia University, Minia 61519, Egypt.

<sup>d</sup>Laboratory of Biomolecule and Plant Breeding, Life Science and Nature Department, Faculty of Exact Science and Life Science and Nature, University of Larbi Ben Mhidi, 4000 Oum El Bouaghi, Algeria.

<sup>e</sup>Department of Biology, College of Science, King Khalid University, 9004, Abha, Kingdom of Saudi Arabia (KSA).

<sup>f</sup>Department of Botany & Microbiology, Faculty of Science, South Valley University, Qena, Egypt.

<sup>g</sup>Graduate School of Integrated Sciences for Life, Hiroshima University, 1-7-1 Kagamiyama, Higashi-Hiroshima 739-8521, Japan.

<sup>h</sup>Department of Chemistry and Biochemistry, Texas Tech University, Lubbock, TX 79409, USA. E-mail: [Paul.pare@ttu.edu](mailto:Paul.pare@ttu.edu); Fax: +1 806 742 1289.

\*Corresponding author: MEF Hegazy, e-mail: [elamir77@live.com](mailto:elamir77@live.com), [me.fathy@nrc.sci.eg](mailto:me.fathy@nrc.sci.eg), Fax: +20-233370931; E-mail: [Paul.pare@ttu.edu](mailto:Paul.pare@ttu.edu); Fax: +1 806 742 1289.

| <b>Supporting data</b>                                                                                                                                                         | <b>Page</b> |
|--------------------------------------------------------------------------------------------------------------------------------------------------------------------------------|-------------|
| S1:NOESY correlations for <b>1</b>                                                                                                                                             | 3           |
| S2:2D representations of interactions of compounds <b>1-12</b> , duranavir and lopinavir with important amino acid residues of SARS-CoV-2 main protease (M <sup>Pro</sup> ).   | 4           |
| S3: 2D representations of interactions of compounds <b>1-12</b> , duranavir and lopinavir with important amino acid residues of SARS-CoV-2 RNA-dependent RNA Polymerase (RdRp) | 6           |
| S4:(+ve) TOF-ESI-MS of <b>1</b> .....                                                                                                                                          | 8           |
| S5: <sup>1</sup> H NMR (C <sub>5</sub> D <sub>5</sub> N, 500 MHz) of <b>1</b> .....                                                                                            | 9           |
| S6: <sup>13</sup> C NMR (C <sub>5</sub> D <sub>5</sub> N, 125 MHz) of <b>1</b> .....                                                                                           | 10          |
| S7:DEPT of <b>1</b> .....                                                                                                                                                      | 11          |
| S8:HSQC of <b>1</b> .....                                                                                                                                                      | 12          |
| S9:HMBC of <b>1</b> .....                                                                                                                                                      | 13          |
| S10: <sup>1</sup> H <sup>1</sup> H COSY of <b>1</b> .....                                                                                                                      | 14          |
| S11:NOESY .....                                                                                                                                                                | 15          |
| S12: LREIMS of <b>2</b> .....                                                                                                                                                  | 16          |
| S13: HREIMS of <b>2</b> .....                                                                                                                                                  | 16          |
| S14: <sup>1</sup> H NMR (CDCl <sub>3</sub> , 500 MHz) of <b>2</b> .....                                                                                                        | 17          |
| S15: <sup>13</sup> C NMR (CDCl <sub>3</sub> , 125 MHz) of <b>2</b> .....                                                                                                       | 18          |
| S16:DEPT of <b>2</b> .....                                                                                                                                                     | 19          |
| S17:HSQC of <b>2</b> .....                                                                                                                                                     | 20          |
| S18:HMBC of <b>2</b> .....                                                                                                                                                     | 21          |
| S19: <sup>1</sup> H <sup>1</sup> H COSY of <b>2</b> .....                                                                                                                      | 22          |

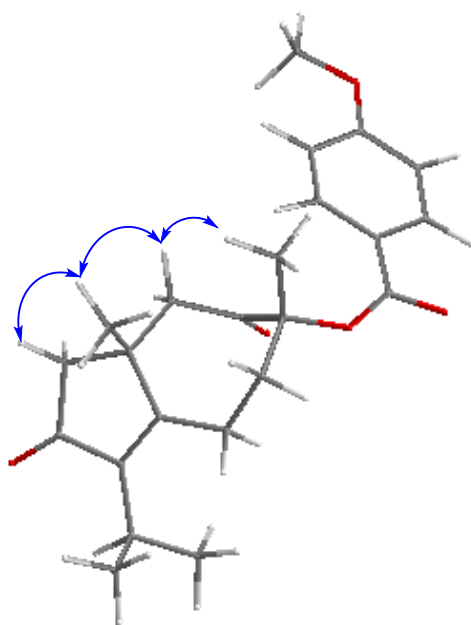

**Figure S1.** NOESY correlations for **1**.

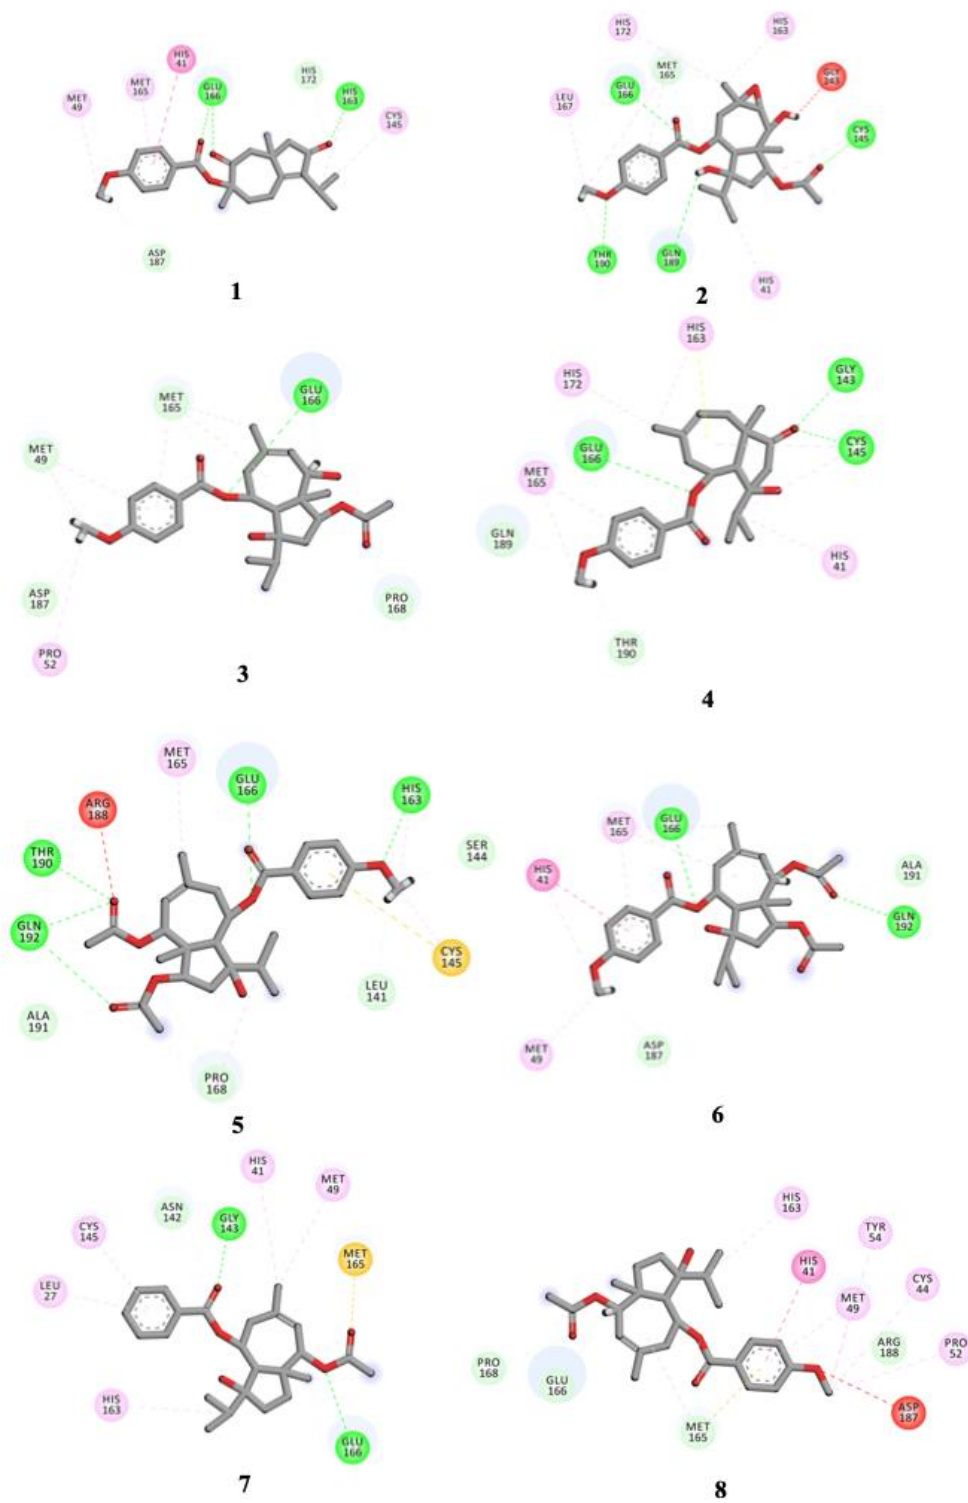

**Figure S2.** 2D representations of interactions of compounds 1-12, duranavir and lopinavir with important amino acid residues of SARS-CoV-2 main protease (M<sup>Pro</sup>).

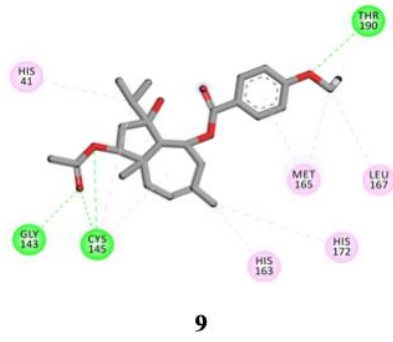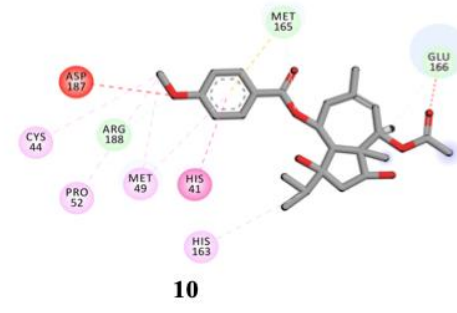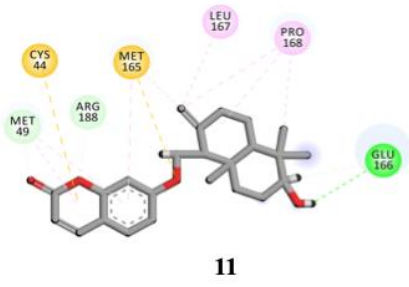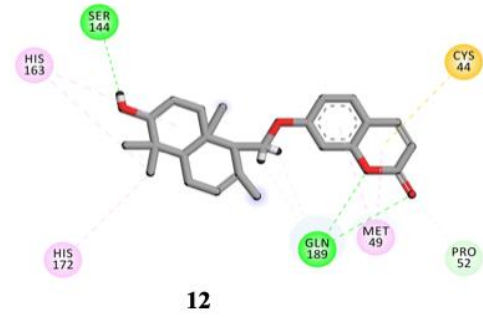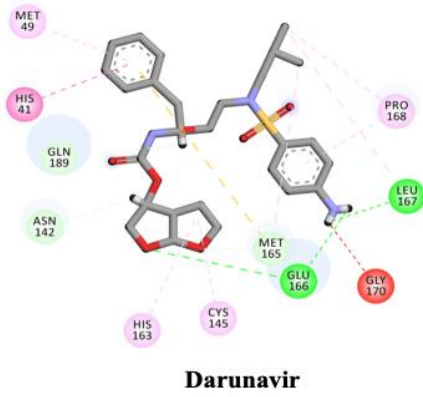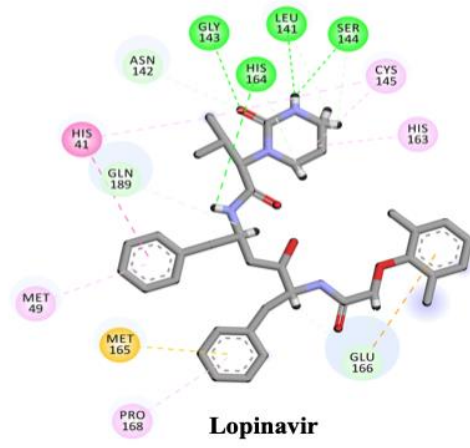

**Interactions**

- Conventional Hydrogen Bond
- Carbon Hydrogen Bond
- Unfavorable Acceptor-Acceptor
- Alkyl
- pi-Alkyl

**Figure S2.**Continued.

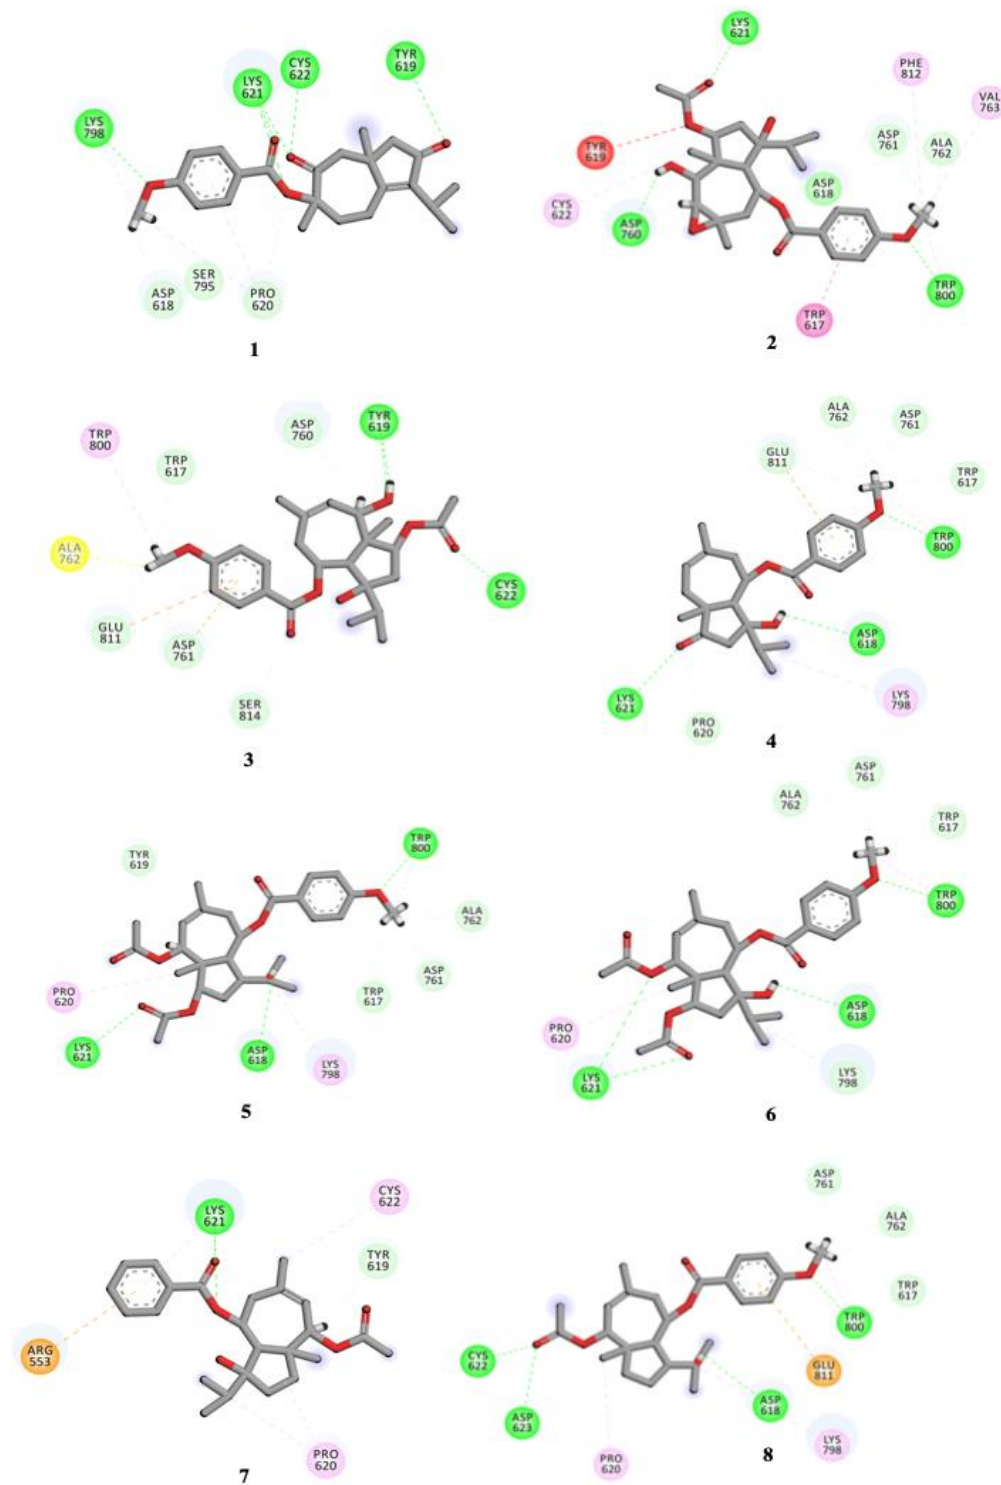

**Figure S3.** 2D representations of interactions of compounds **1-12**, duranavir and lopinavir with important amino acid residues of SARS-CoV-2 RNA-dependent RNA Polymerase (RdRp).

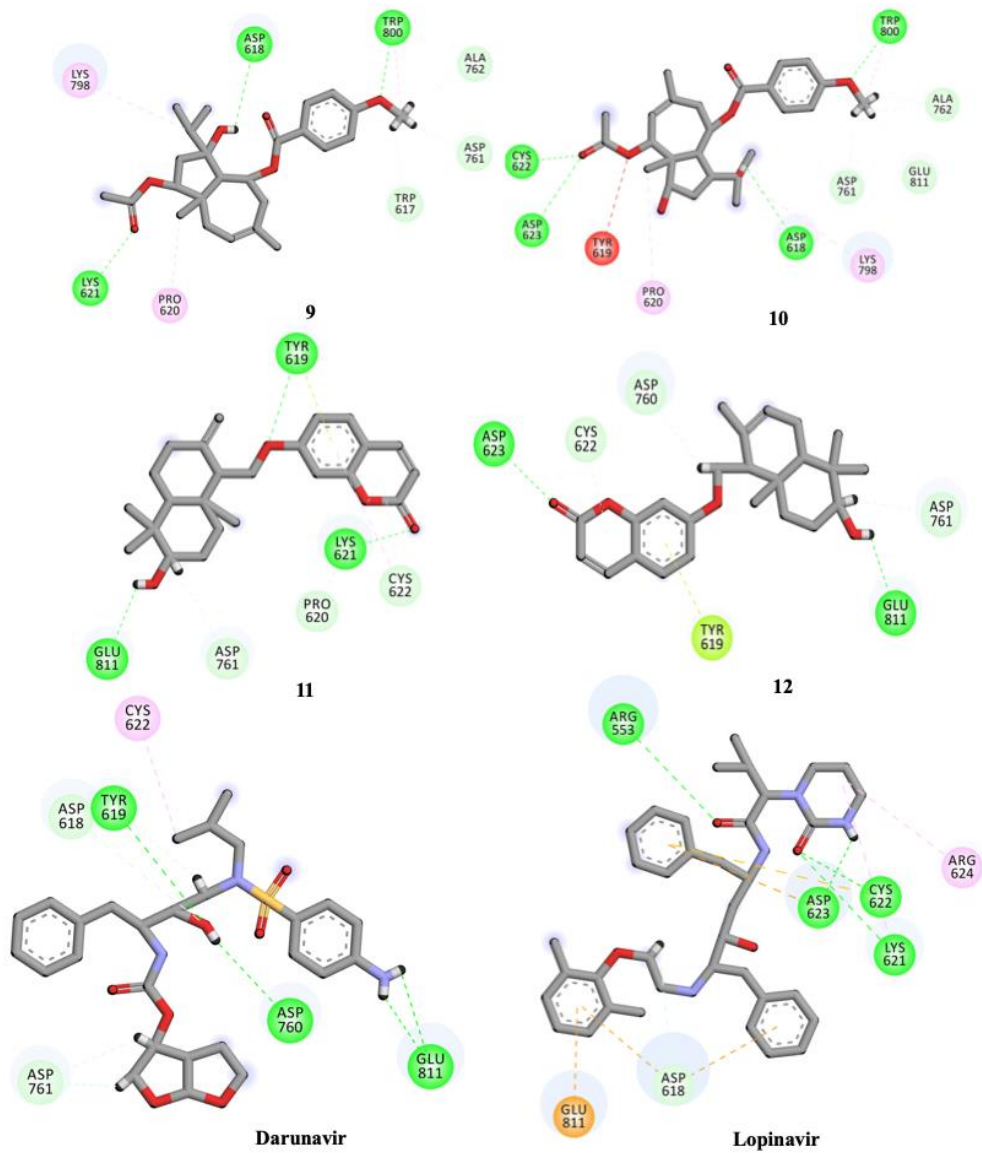

**Interactions**

- Conventional Hydrogen Bond
- Carbon Hydrogen Bond
- Unfavorable Acceptor-Acceptor
- Alkyl
- pi-Alkyl

**Figure S3.**Continued.

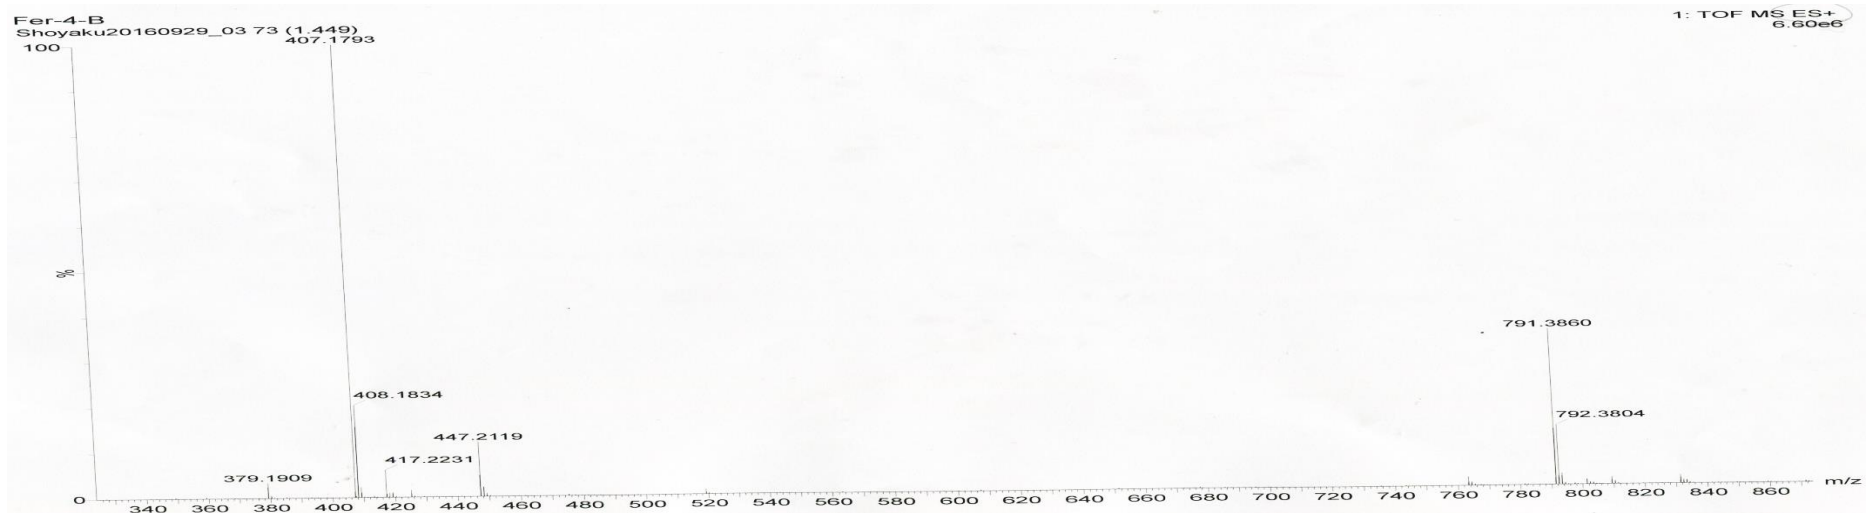

Monoisotopic Mass, Even Electron Ions  
152 formula(e) evaluated with 25 results within limits (up to 10 closest results for each mass)

Elements Used:

C: 0-100 H: 0-250 O: 0-20 Na: 0-1

Fer-4-B

Shoyaku20160929\_03 73 (1.449) AM2 (Ar,10000.0,0.00,0.00)

1: TOF MS ES+  
1.68e+007

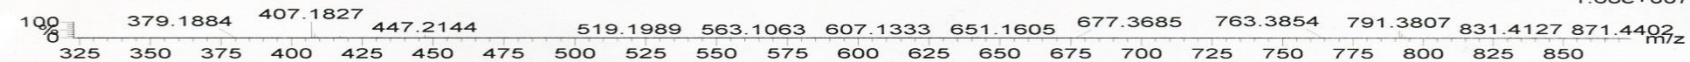

Minimum: 0.0  
Maximum: 50.0 10.0 30.0

| Mass     | Calc. Mass | mDa  | PPM  | DBE | i-FIT | Norm  | Conf (%) | Formula       |
|----------|------------|------|------|-----|-------|-------|----------|---------------|
| 407.1827 | 407.1834   | -0.7 | -1.7 | 9.5 | 394.7 | 1.655 | 19.11    | C23 H28 O5 Na |

FigureS4:(+ve) TOF-ESI-MS of 1



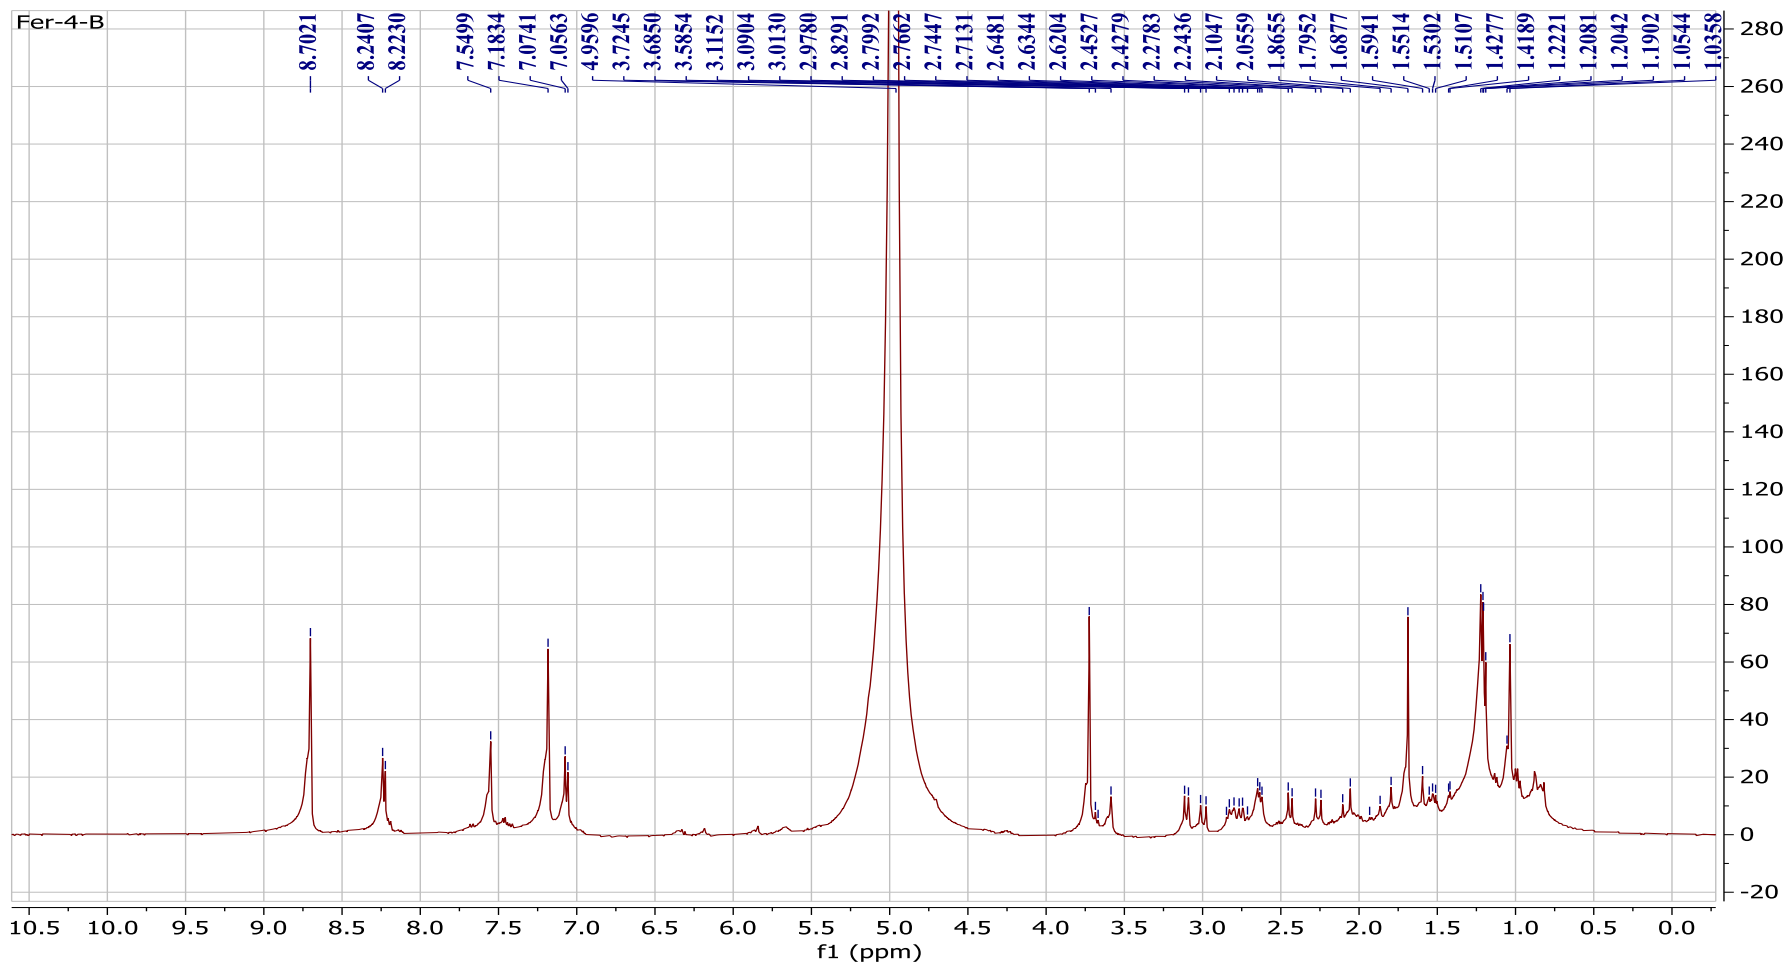

FigureS5:  $^1\text{H}$  NMR ( $\text{CDCl}_3$ , 500 MHz) of **1**

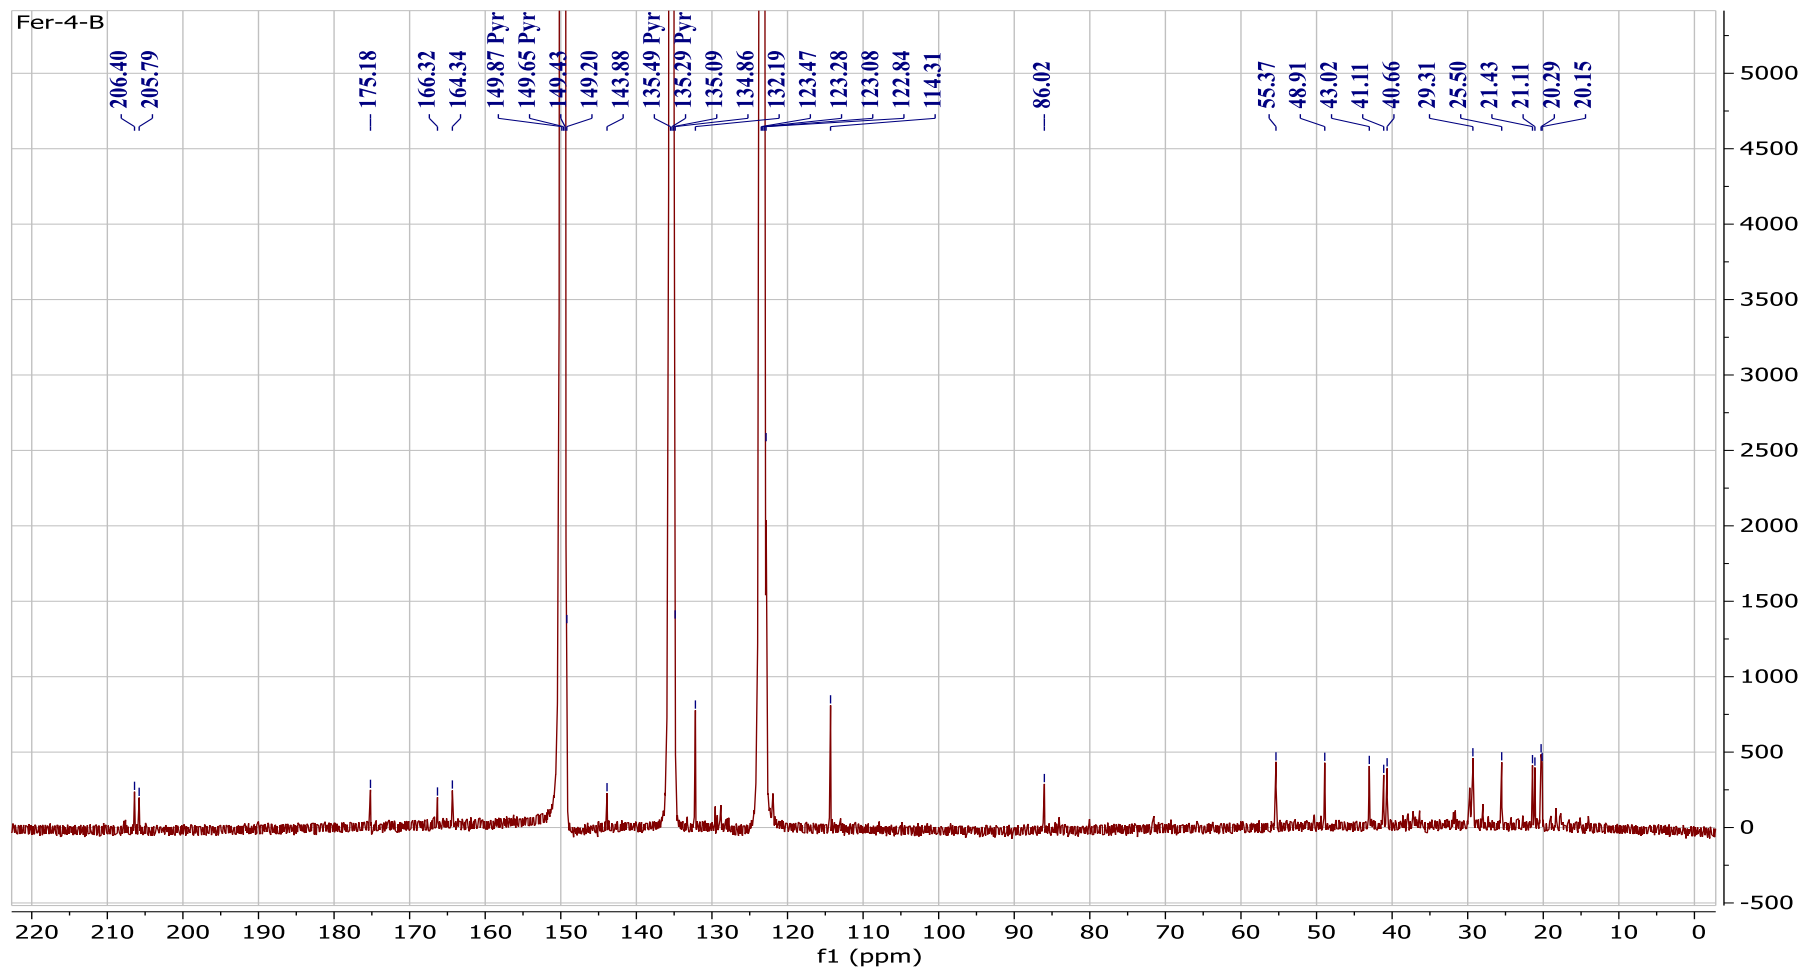

Figure S6:  $^{13}\text{C}$  NMR ( $\text{C}_5\text{D}_5\text{N}$ , 125 MHz) of **1**

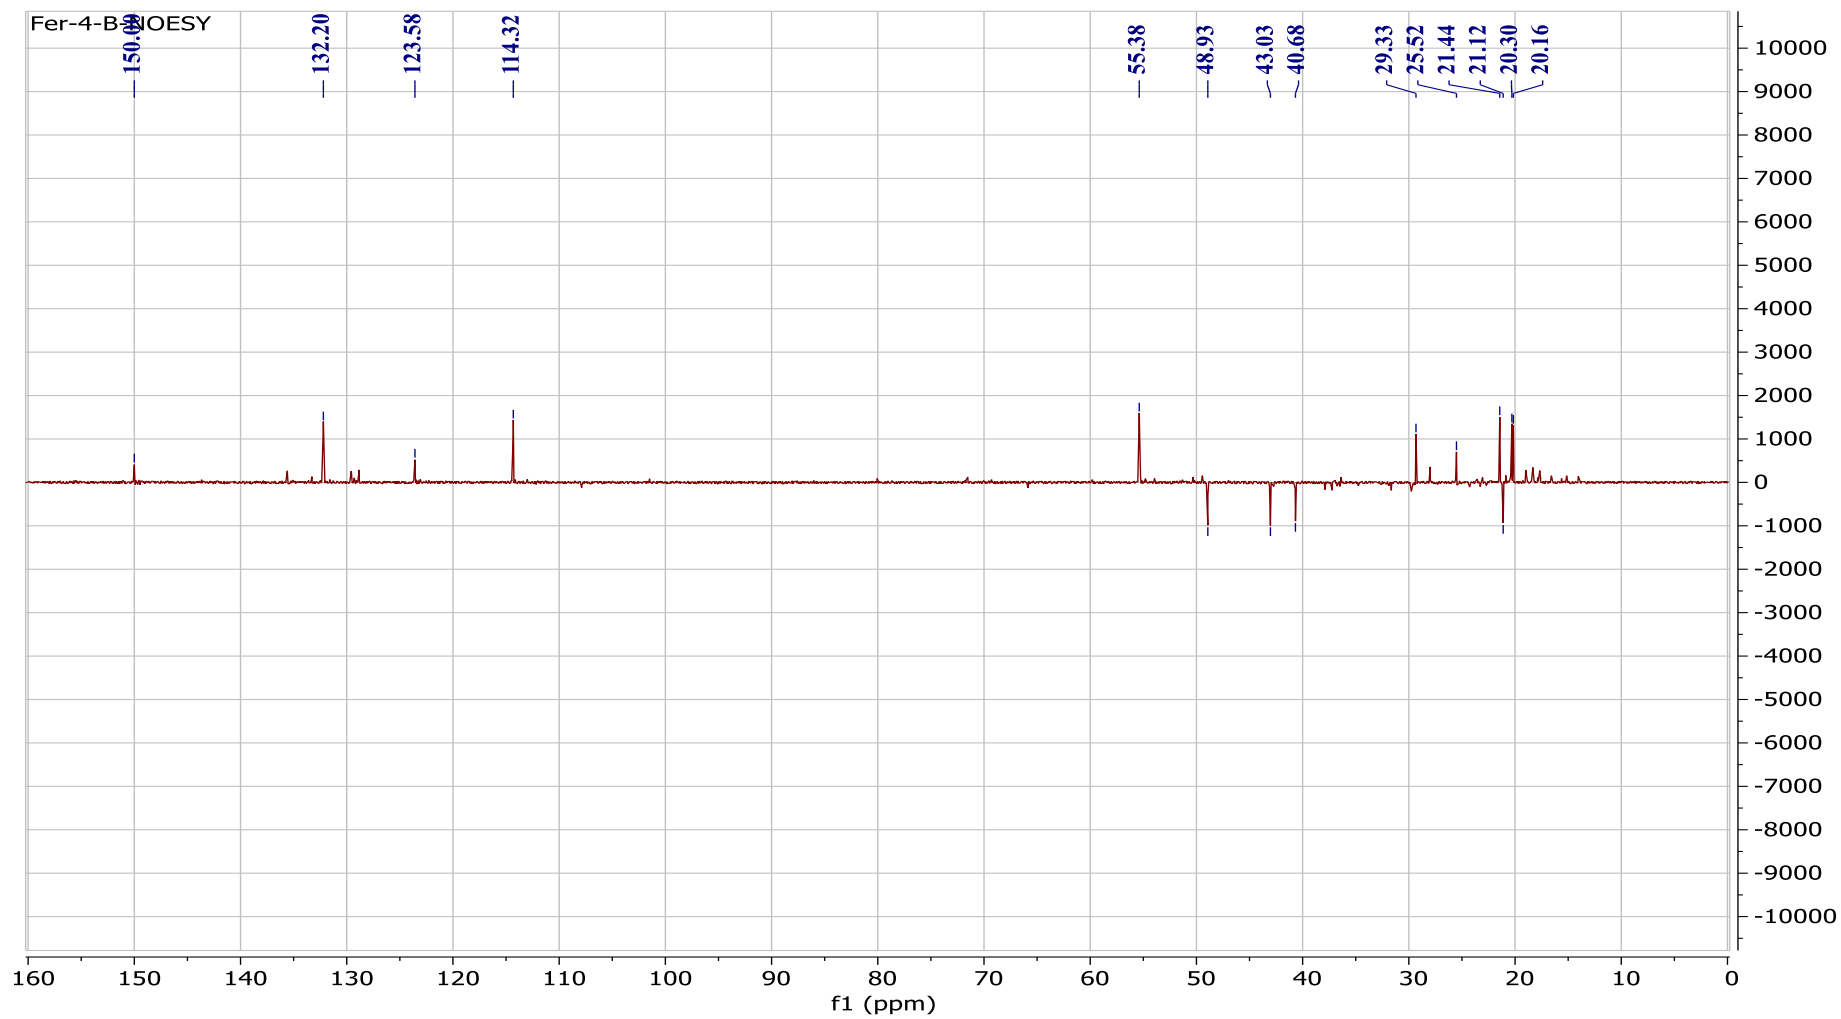

FigureS7:DEPT of 1

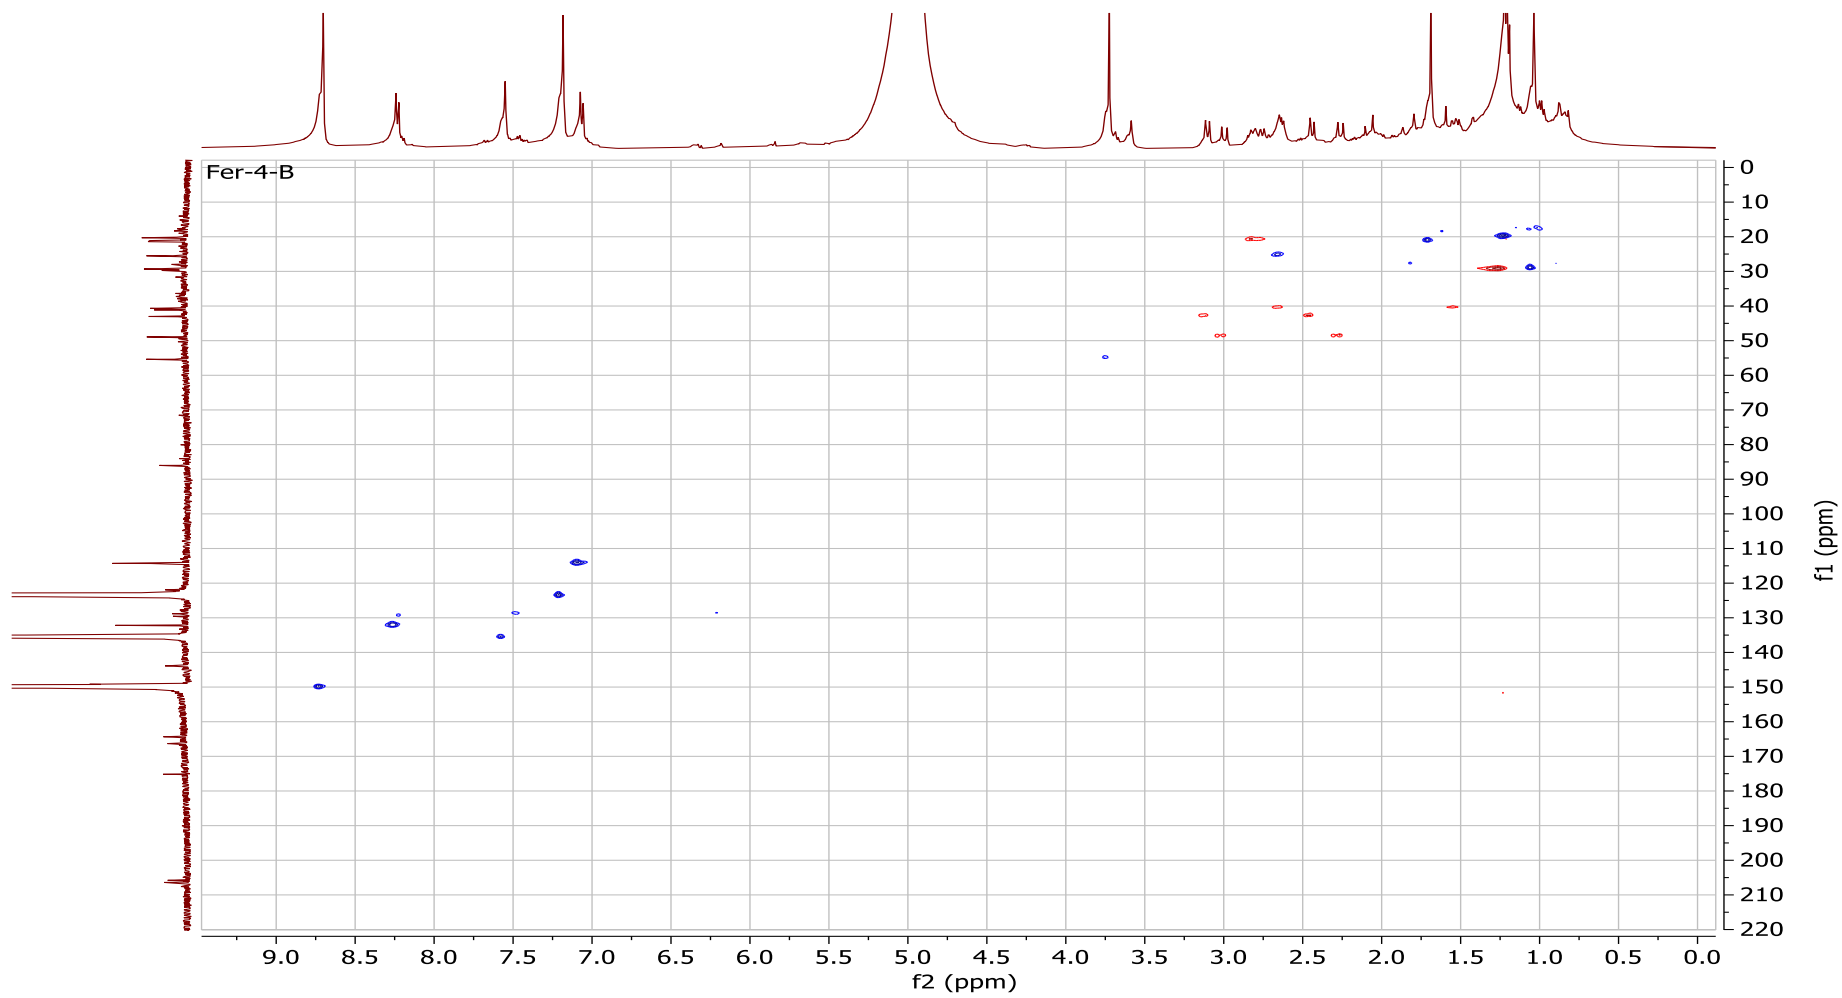

FigureS8:HSQC of 1

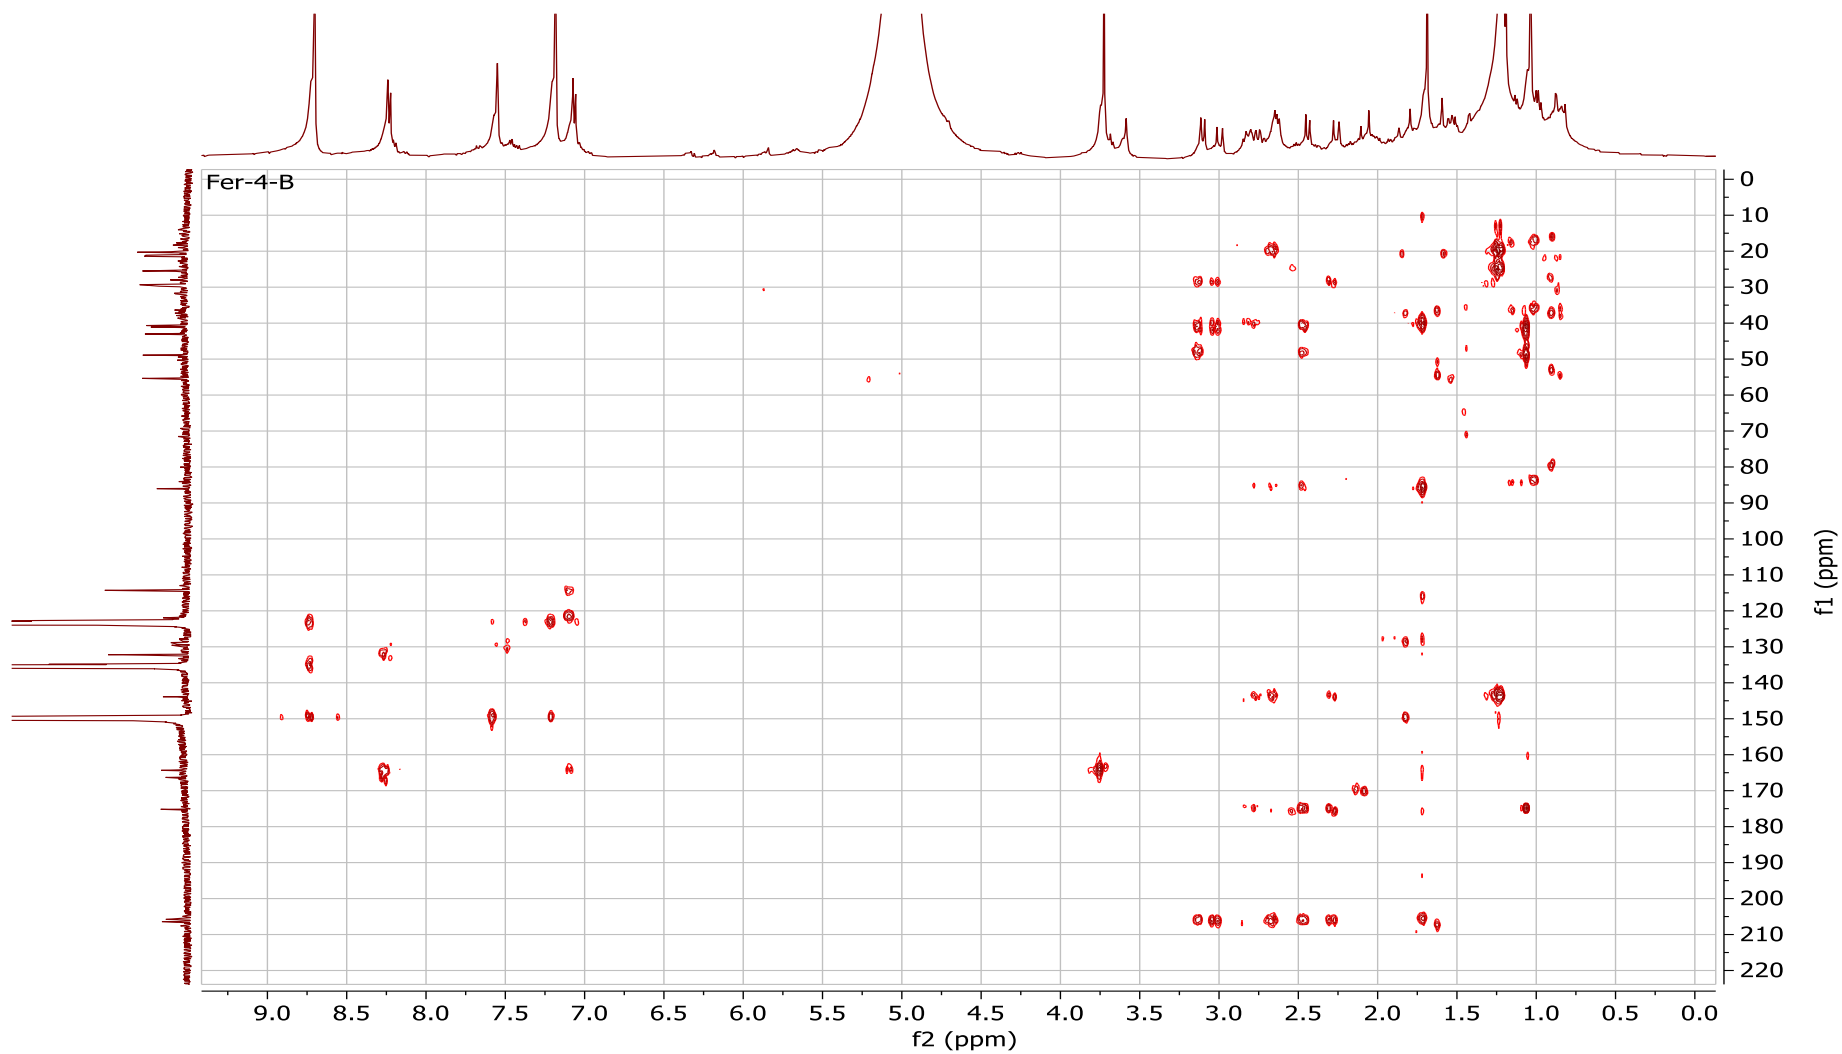

FigureS9:HMBC of 1

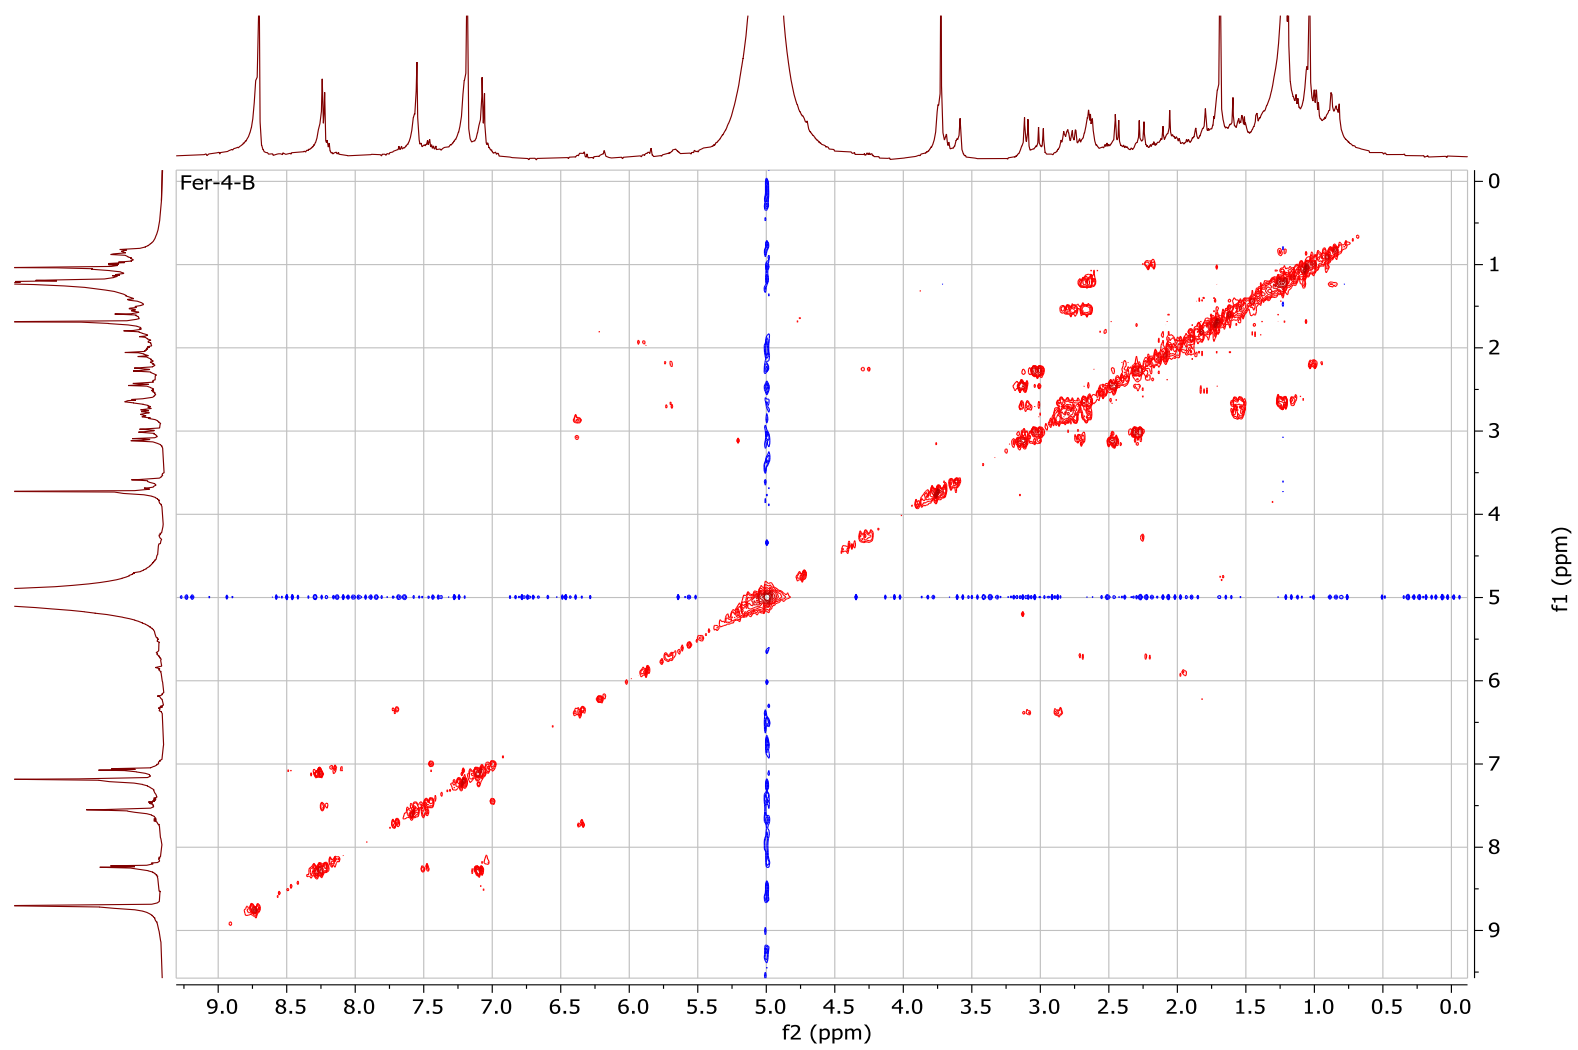

FigureS10:  $^1\text{H}$   $^1\text{H}$  COSY of **1**

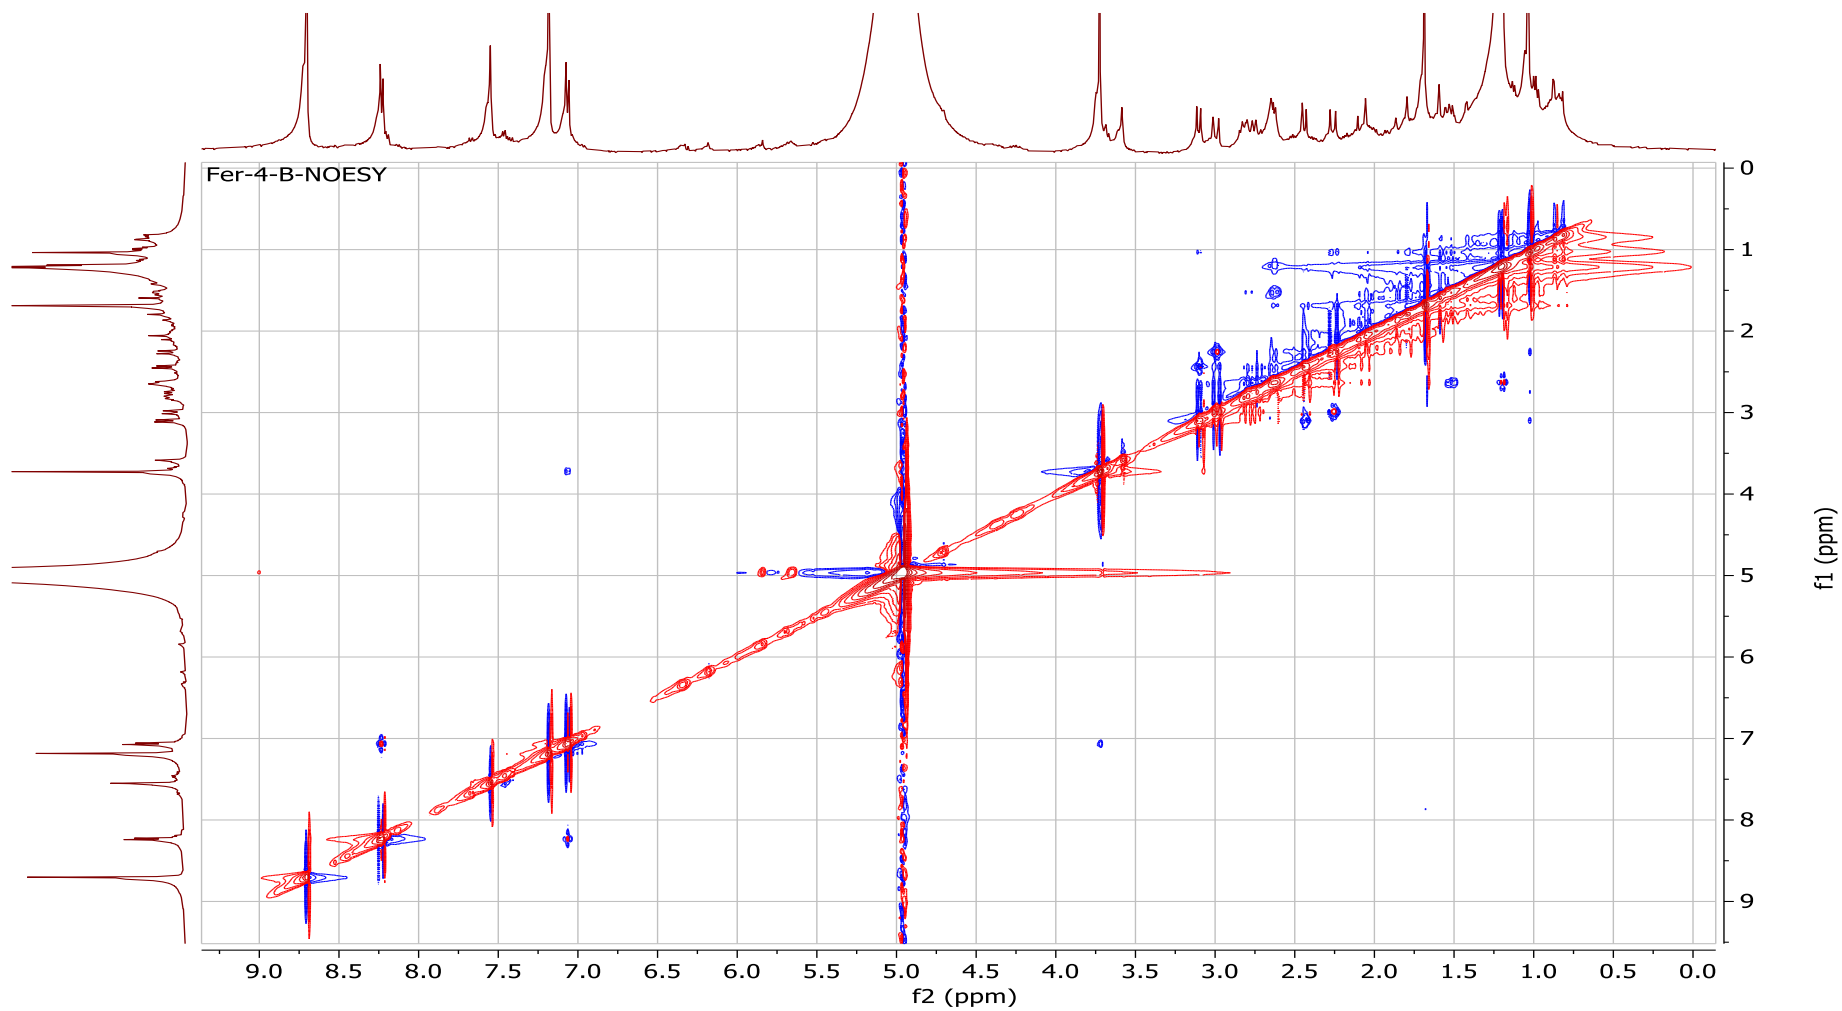

FigureS11:NOESY of 1

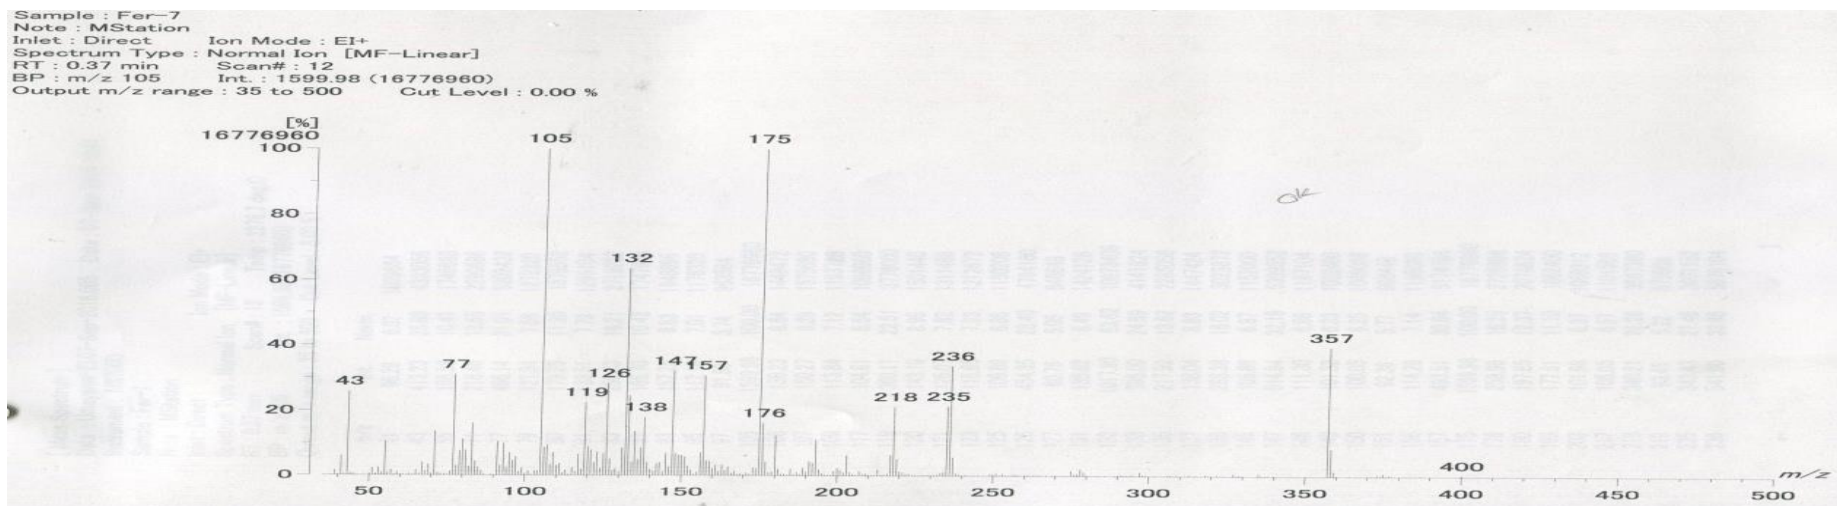

Figure S12: LREIMS of 2

Date : 23-Mar-2019 12:11  
 Instrument: MS700D  
 Sample: Fer-7  
 Note: MStation  
 Inlet: Direct Ion Mode: EI+  
 RT: 1.69 min Scan#: 19  
 Elements: C 150/0, H 250/0, O 50/0  
 Mass Tolerance: 5mmu  
 Unsaturation (U.S.): 0.0 - 15.0

| Observed | m/z      | Int %  | Err. [ppm I mmu] | U.S  | Compos  |
|----------|----------|--------|------------------|------|---------|
| 1        | 400.2249 | 100.00 | -0.1 / -0.6      | 13.5 | C24 H32 |

Figure S13: HREIMS of 2



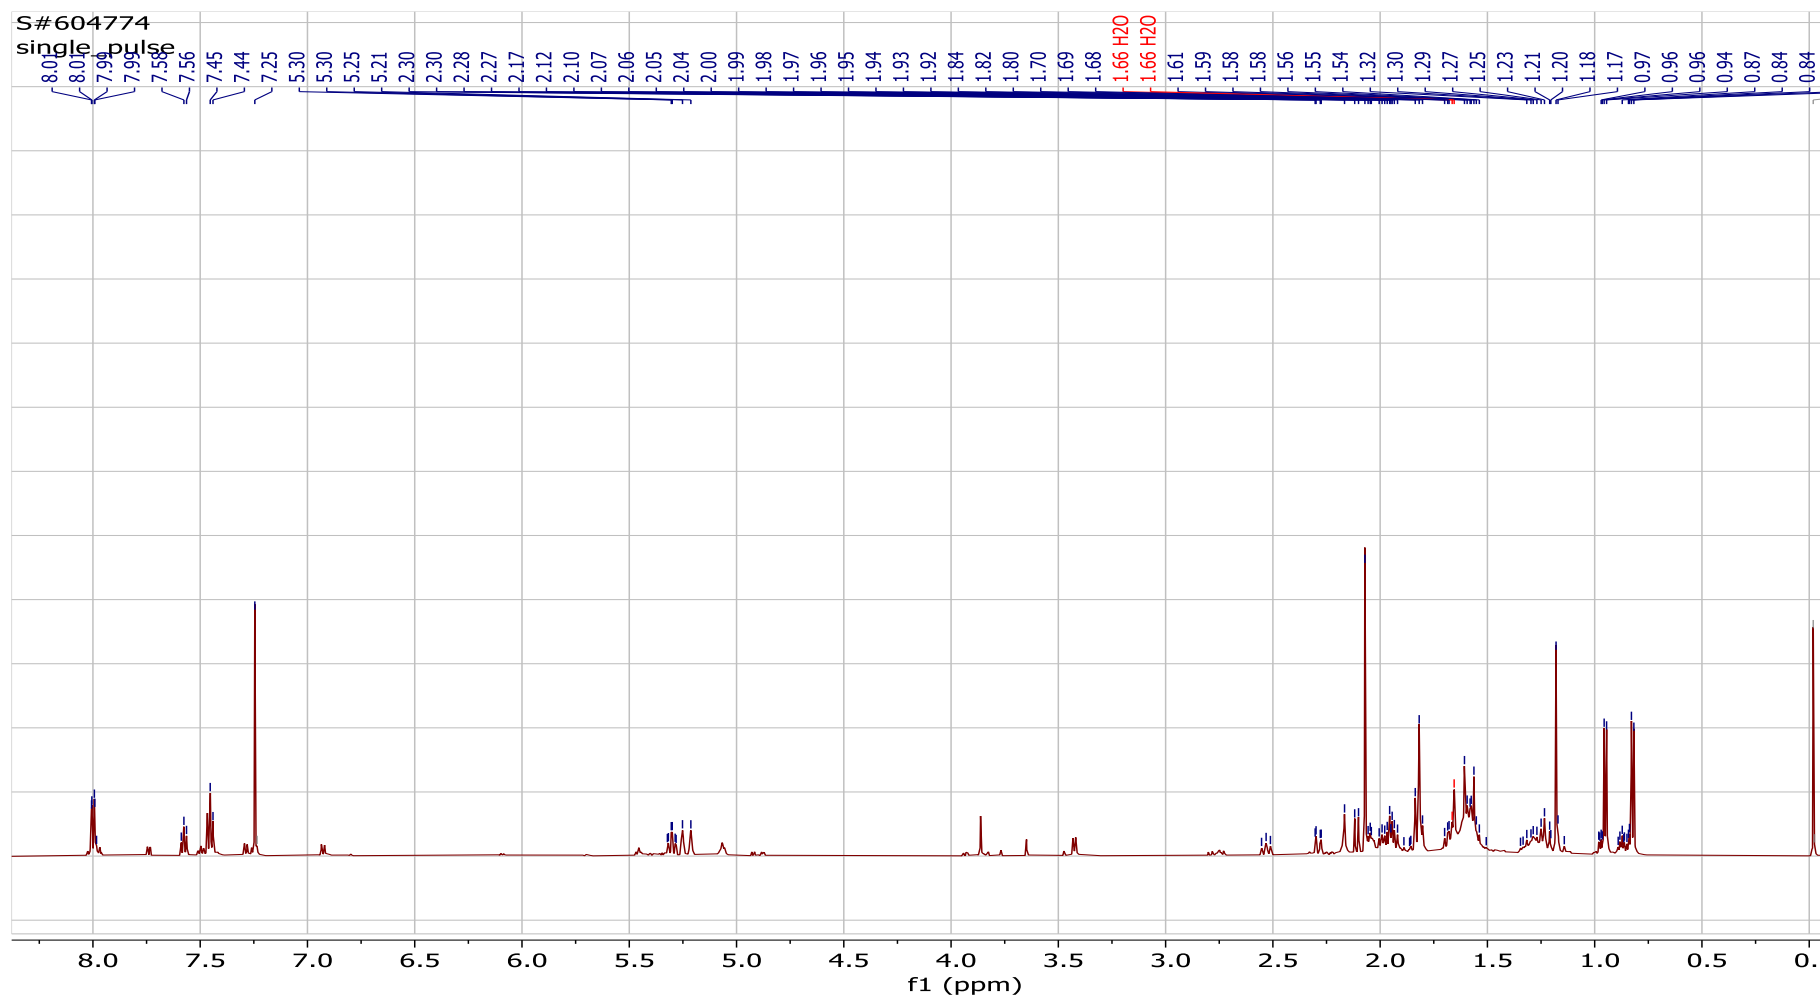

Figure S14:  $^1\text{H}$  NMR of **2** ( $\text{CDCl}_3$ , 500 Hz)

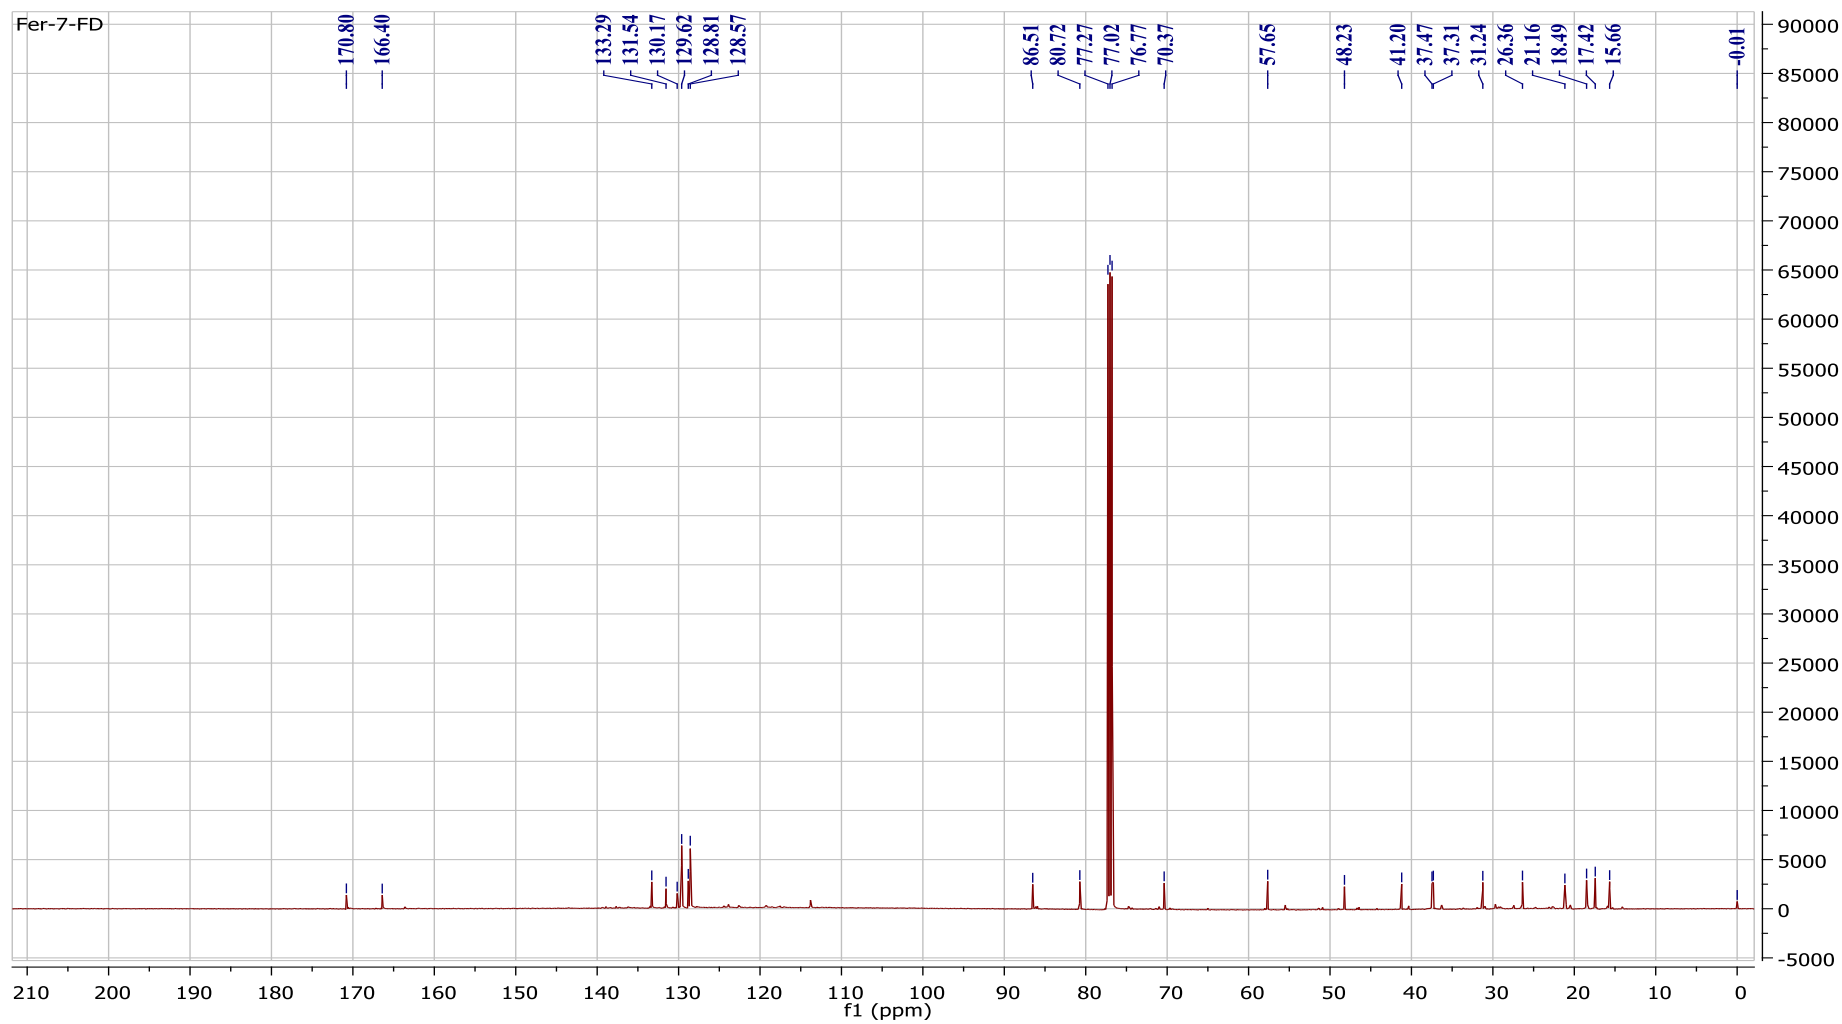

**Figure S15:**  $^{13}\text{C}$  NMR of **2** ( $\text{CDCl}_3$ , 125 Hz)

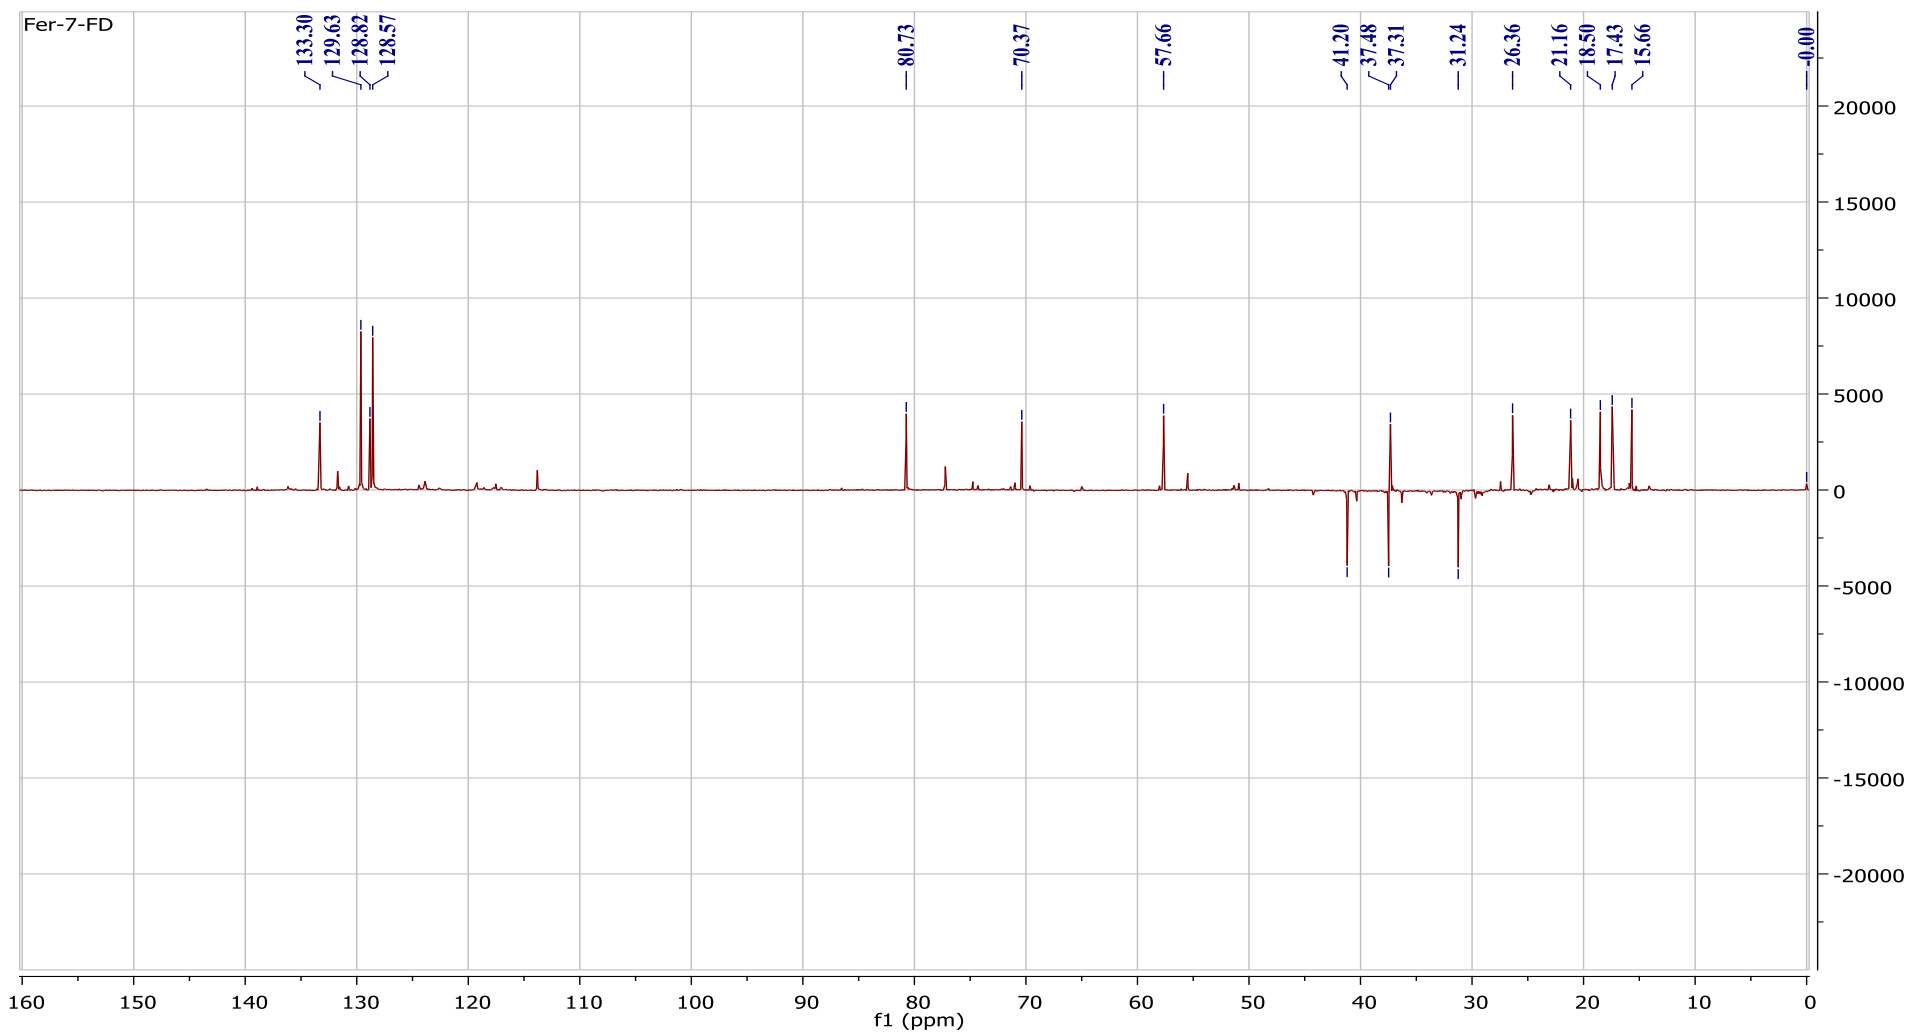

**FigureS16:** DEPT of 2

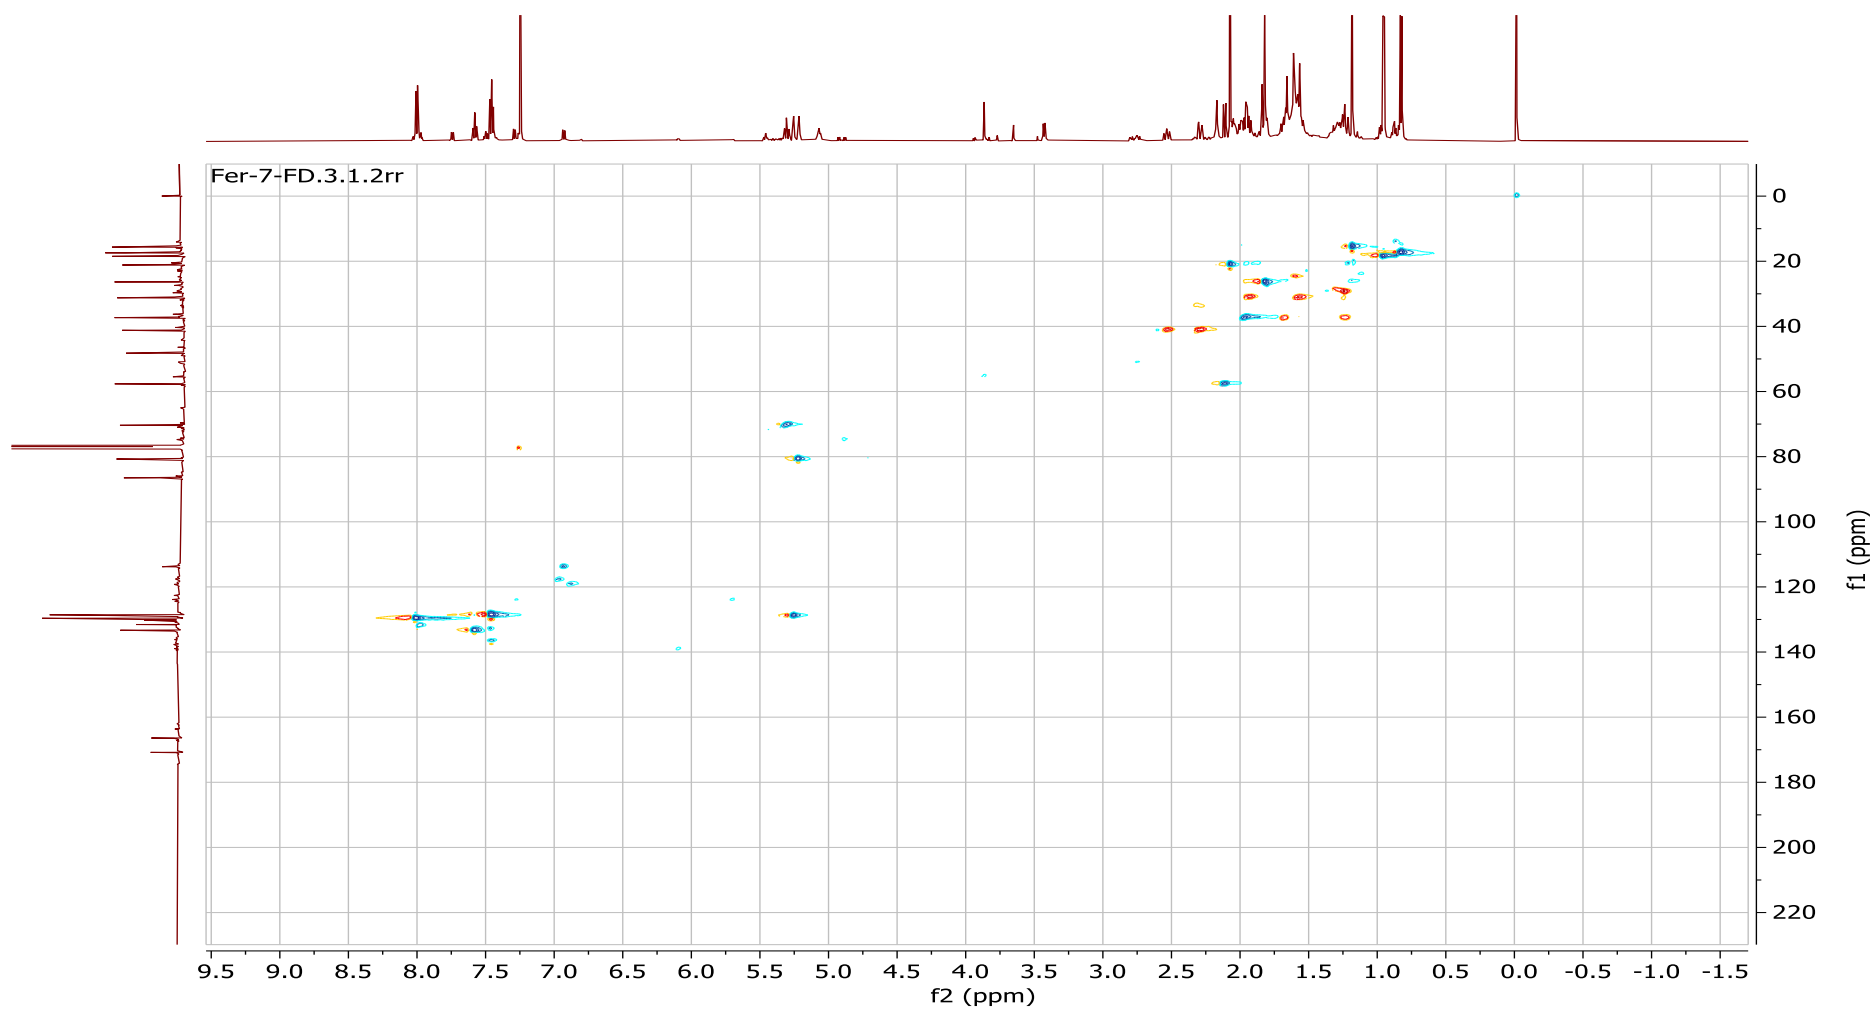

FigureS17: HSQC of 2

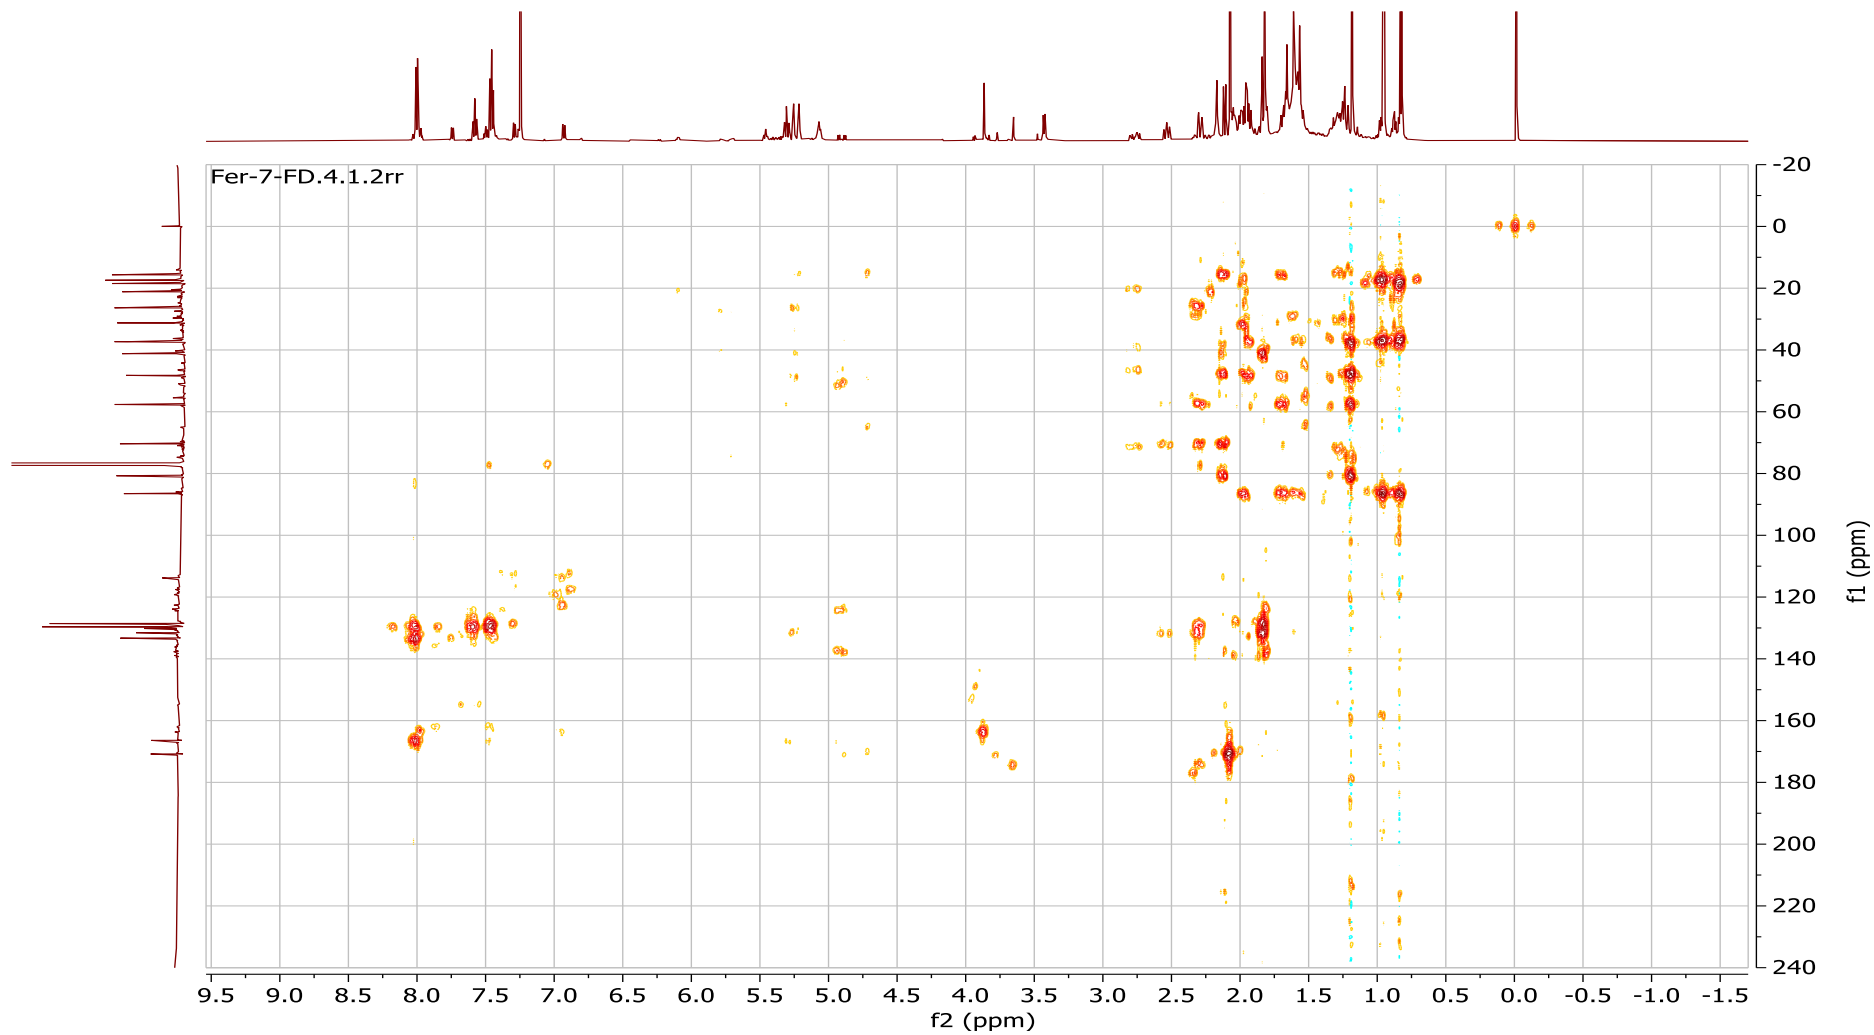

Figure S18: HMBC of 2

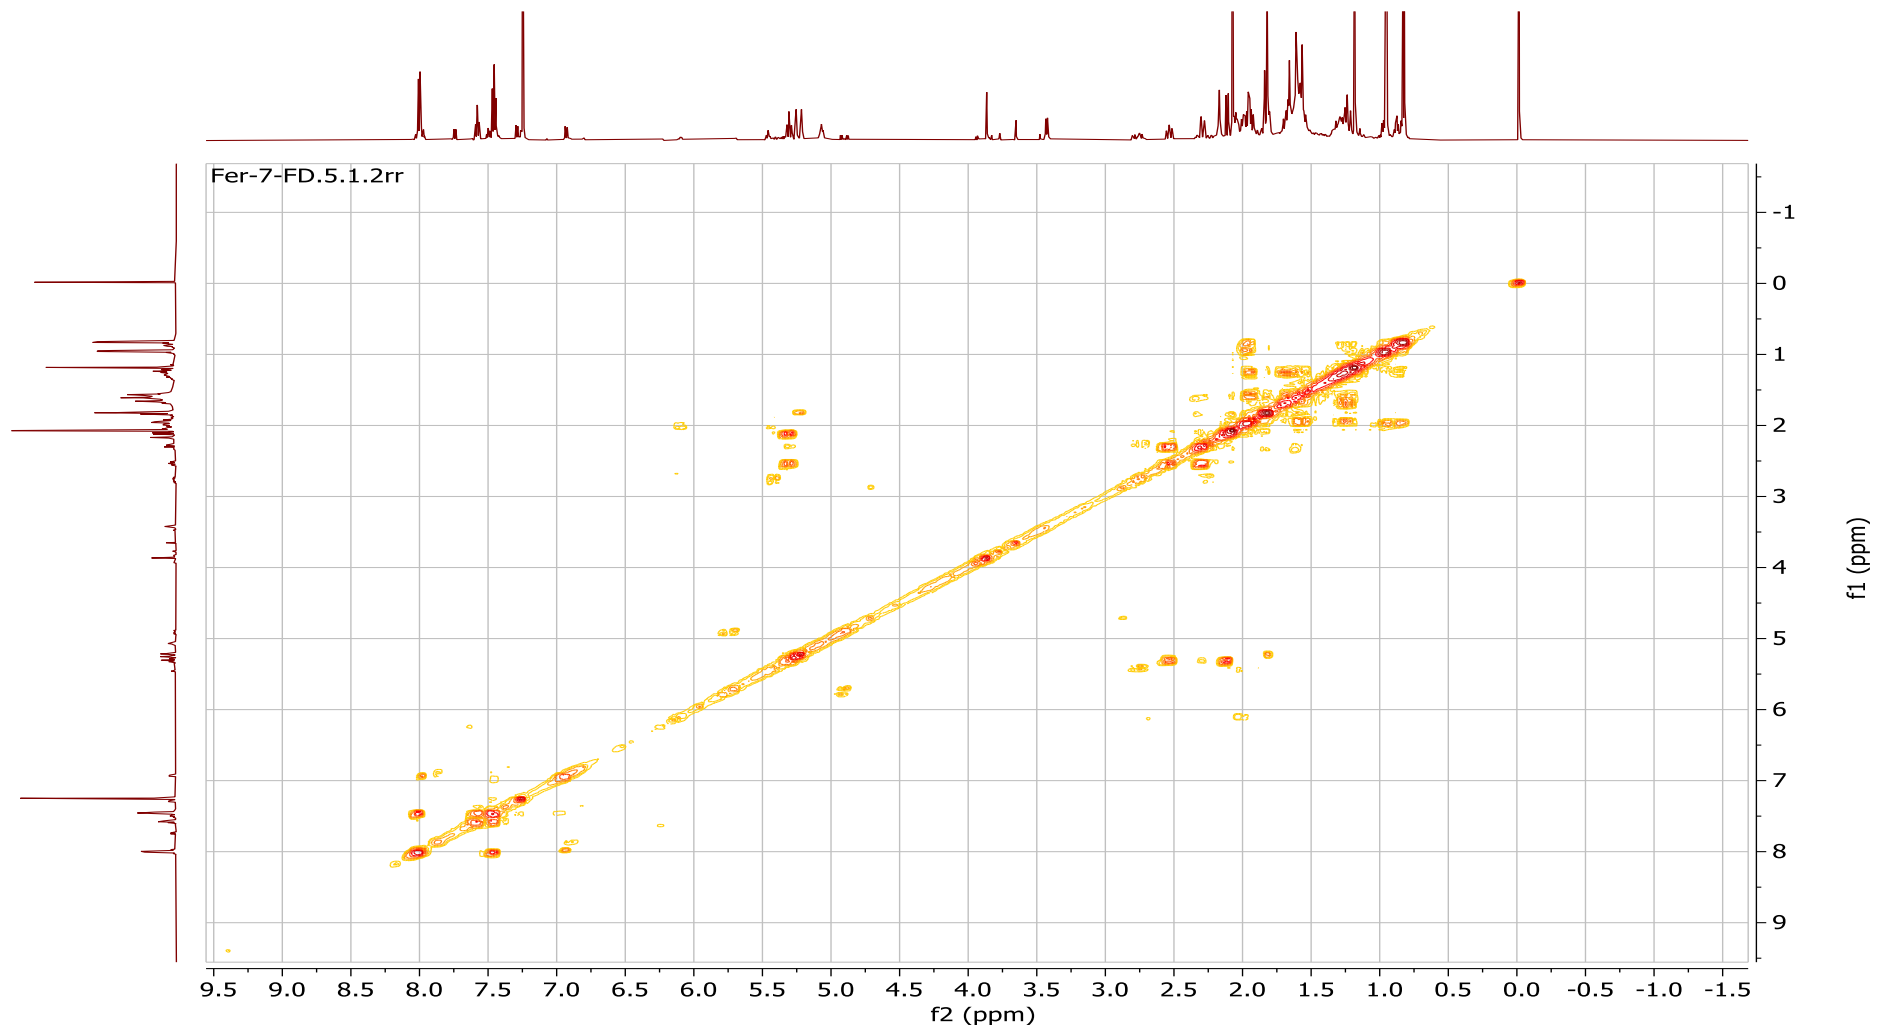

FigureS19:  $^1\text{H}$ - $^1\text{H}$  COSY of 2
